# Supplementary material for: Gene-level association analysis of systemic sclerosis: A comparison of African-Americans and White populations
Source: PLoS One. 2018 Jan 2;13(1):e0189498. doi: 10.1371/journal.pone.0189498 (PMC5749683; doi:10.1371/journal.pone.0189498)
Supplement: S9 Table — (a) The genes identified in the GWAS of African Americans as harboring most significant SNPs (p<10−3), with the genes at least nominally significant at the gene level in both African Americans and Whites shown at the top.(b). SNPs nominally significant in both African Americans and Whites. (XLSX) [file pone.0189498.s009.xlsx]

## Sheet: B_SNP_GWAS_and_W
S9 Table
(a) The genes identified in the GWAS of African Americans as harboring most significant SNPs (p<10-3), with the genes at least nominally significant at the gene level in both African Americans and Whites
Gene	Chr	African American_GWAS	# SNPs	P-value	Top SNP	SNP p-value	White_GWAS	# SNPs	P-value	Top SNP	SNP p-value
SLC2A13	12		160	0.01846	rs6581439	0.0004214		86	0.01858	rs7135678	1.338e-07
NRG3	10		502	0.02221	rs10885506	0.0001576		271	0.03089	rs932512	0.002733
SLC10A7	4		82	0.02744	rs2356940	0.0003611		55	0.00995	rs1057560	0.005279
MKL1	22		56	0.0109	rs6001932	0.0006696		33	0.02677	rs4507196	0.006453
DZIP1L	3		43	0.00257	rs405265	0.0006653		21	0.048	rs3773770	0.01044
C8orf58	8		40	0.00648	rs3779727	0.0007583		17	0.04407	rs4872524	0.0144
KIAA1967	8		41	0.0076	rs3779727	0.0007583		16	0.04955	rs4872524	0.0144
HDAC1	1		13	0.01257	rs7535470	0.0008516		3	0.02636	rs476153	0.02237
XKR4	8		177	0.614	rs16921663	0.0009375		104	0.0332	rs2658922	1.385e-08
GTF3C1	16		39	0.00575	rs16976842	0.0004265		21	0.152	rs3093406	1.028e-05
CNTN4	3		689	0.658	rs9849609	0.0006021		453	0.274	rs334782	3.542e-05
GPATCH2	1		71	0.109	rs11805706	0.0004642		38	0.118	rs265120	3.7e-05
CYB5R3	22		47	0.122	rs135106	0.0004981		33	0.376	rs137043	8.043e-05
FRAS1	4		253	0.36	rs1875649	0.0008754		126	0.02363	rs6847138	0.0001066
PARK2	6		672	0.434	rs9458246	0.0007729		450	0.127	rs1893116	0.0001679
RGS7	1		339	0.289	rs17696815	0.0006014		199	0.108	rs6697598	0.0002987
CR2	1		45	0.05374	rs2182909	0.000295		23	0.309	rs4317805	0.0003577
CR1	1		59	0.108	rs2182909	0.000295		36	0.417	rs4317805	0.0003577
ROBO2	3		259	0.08661	rs9809056	0.0007848		174	0.10748	rs1899373	0.0004229
ODZ4	11		445	0.237	rs1790555	3.838e-05		270	0.251	rs529653	0.0004386
CNTN5	11		698	0.632	rs1216175	0.0005651		467	0.493	rs4753939	0.0004559
EXOC2	6		140	0.322	rs13205238	9.603e-05		104	0.00343	rs2804731	0.000466
CDH13	16		1214	0.386	rs8054283	0.000634		700	0.268	rs8055236	0.0005117
UNC5C	4		243	0.274	rs7697199	7.475e-05		145	0.04357	rs10021966	0.0005382
MICALCL	11		128	0.378	rs11022340	0.0003583		71	0.0208	rs7121541	0.0005506
MED13L	12		92	0.02675	rs11067981	0.000497		68	0.325	rs7967006	0.0005521
MACROD2	20		1035	0.606	rs6034299	0.0007861		643	0.111	rs4814372	0.0005663
LASP1	17		56	0.243	rs600158	0.0007807		33	0.494	rs923370	0.0007857
COL13A1	10		210	0.2	rs12779503	0.0005162		137	0.13	rs999706	0.0008022
CTNNA2	2		620	0.206	rs2974139	0.0004956		399	0.614	rs17018721	0.0008658
RYR2	1		425	0.323	rs7520520	0.0005914		214	0.891	rs6696837	0.0008725
CDYL2	16		124	0.06726	rs7190322	0.0004681		76	0.218	rs12933466	0.0008742
SLC39A12	10		97	0.154	rs2488151	5.016e-05		59	0.0532	rs2488155	0.0009014
FAM19A1	3		238	0.122	rs17047430	0.0002924		134	0.361	rs13094511	0.0009384
CSMD1	8		2125	0.776	rs2627515	0.0003362		1572	0.416	rs10503289	0.0009547
ERBB4	2		458	0.207	rs16848535	0.0002268		324	0.202	rs10205553	0.0009854
ST8SIA1	12		74	0.004048	rs1160783	1.64e-05		51	0.146	rs17653452	0.001058
MAST4	5		279	0.01665	rs33716	0.0002329		162	0.558	rs2230525	0.001062
PARVA	11		135	0.203	rs11022340	0.0003583		88	0.287	rs10765959	0.001073
A2BP1	16		1470	0.761	rs8044409	0.0004971		875	0.356	rs11649041	0.001203
C15orf41	15		126	0.06127	rs16963383	0.0001175		73	0.106	rs717316	0.001227
KCNIP1	5		290	0.217	rs6877607	0.0007792		183	0.283	rs11738868	0.001316
ITGA11	15		118	0.243	rs898582	0.0004493		75	0.374	rs1007617	0.00151
IL7R	5		56	0.136	rs13436926	0.0007851		25	0.01797	rs11742240	0.001615
CDH12	5		274	0.26	rs4437341	0.0009105		176	0.409	rs440188	0.001777
GPC5	13		520	0.546	rs12875094	0.0008921		264	0.208	rs1373863	0.001899
SDK1	7		406	0.617	rs608438	0.0003035		282	0.628	rs2097884	0.001926
CENTG2	2		172	0.177	rs2873308	0.0005581		119	0.364	rs6726521	0.001937
SNRPB	20		46	0.107	rs6049635	0.0007855		34	0.245	rs6114605	0.002011
ZNF343	20		49	0.06215	rs6049635	0.0007855		40	0.282	rs6114605	0.002011
TMC2	20		91	0.0359	rs6049635	0.0007855		65	0.491	rs6114605	0.002011
PRKCE	2		344	0.46	rs6544852	0.0003782		257	0.195	rs12994911	0.002094
PHACTR2	6		158	0.545	rs12191296	0.0006242		100	0.471	rs7738300	0.002159
SNX29	16		322	0.409	rs4780437	0.00075		237	0.247	rs9922786	0.002242
GPR98	5		199	0.143	rs4916831	0.0001835		138	0.101	rs490812	0.002312
RADIL	7		54	0.03152	rs17135128	0.0004719		25	0.0852	rs2965042	0.0024
PPP1R9B	17		54	0.104	rs3809762	0.0005978		20	0.17	rs2075555	0.002456
MAP3K4	6		72	0.04682	rs9355861	0.0001172		52	0.513	rs9347480	0.002872
RIMS4	20		54	0.531	rs2281862	0.0006771		25	0.165	rs6031807	0.002947
COL27A1	9		194	0.276	rs1991707	0.0003694		144	0.639	rs2002284	0.002965
CHL1	3		160	0.109	rs11721252	0.0004134		91	0.394	rs2196038	0.003043
KIAA0265	7		47	0.234	rs13245505	0.0006268		22	0.00709	rs4236629	0.003077
LRRTM1	2		38	0.01768	rs13402891	0.0008706		28	0.283	rs17018937	0.003121
MDS1	3		226	0.08412	rs1918966	0.0002087		137	0.152	rs1918964	0.003255
CELSR1	22		121	0.212	rs4823852	0.0004684		74	0.107	rs3788693	0.003255
JMJD2B	19		76	0.372	rs2613768	0.0009275		49	0.08752	rs1552046	0.00332
CXCR4	2		30	0.111	rs6707117	0.0004501		9	0.198	rs953388	0.003353
ERG	21		232	0.273	rs2836524	0.0003408		135	0.151	rs2836439	0.003681
KSR2	12		368	0.292	rs816207	0.0006597		233	0.685	rs10444498	0.003845
KYNU	2		72	0.394	rs6758612	0.0006986		50	0.294	rs354690	0.003995
SPEF2	5		110	0.402	rs13436926	0.0007851		62	0.425	rs931555	0.004004
KIAA1377	11		47	0.134	rs12363310	4.026e-06		31	0.08819	rs7110790	0.004025
DDR2	1		92	0.04373	rs7516390	0.0005617		44	0.298	rs10917603	0.004138
SHANK3	22		37	0.235	rs7284093	0.0008844		21	0.01573	rs2071421	0.004215
KPNA3	13		51	0.02102	rs9535333	0.0005216		28	0.05753	rs1923730	0.004233
ACPL2	3		56	0.05222	rs9819541	0.0009572		42	0.433	rs6772975	0.004302
DKK2	4		48	0.00707	rs433201	0.0008998		26	0.173	rs10488898	0.004377
SGCG	13		153	0.285	rs1536723	0.0009775		76	0.613	rs1887756	0.004511
SUSD1	9		87	0.135	rs7040124	0.0007697		58	0.419	rs10981208	0.004732
P2RY6	11		31	0.264	rs7103608	0.0002138		25	0.04478	rs508859	0.004861
P2RY2	11		43	0.206	rs7103608	0.0002138		33	0.08449	rs508859	0.004861
LSAMP	3		199	0.215	rs9289043	0.0006782		124	0.267	rs7632246	0.005005
ABP1	7		73	0.0276	rs6980179	0.0007719		36	0.185	rs10250599	0.00512
CR1L	1		43	0.157	rs17046685	0.000498		24	0.08622	rs1998539	0.005188
LARGE	22		410	0.329	rs724775	0.0006427		240	0.235	rs2267296	0.00523
ARMETL1	10		38	0.01123	rs7894284	0.0006758		26	0.206	rs2601735	0.005276
MAGI2	7		739	0.881	rs4730257	0.0007648		478	0.666	rs319872	0.005435
AK5	1		181	0.198	rs1377733	0.0008911		108	0.498	rs12126604	0.005442
PDE1A	2		143	0.08636	rs12468743	0.0003934		84	0.192	rs833126	0.00561
FLJ23834	7		95	0.02834	rs396600	0.0002408		64	0.10438	rs234	0.006009
MGAT5B	17		91	0.09229	rs563079	0.0002586		75	0.225	rs11868247	0.006236
FAM19A5	22		251	0.478	rs131030	0.0003468		161	0.698	rs131026	0.006457
ZC3HC1	7		37	0.173	rs13245505	0.0006268		17	0.01357	rs17133163	0.006474
HLCS	21		126	0.166	rs17284196	0.0008079		84	0.467	rs4402840	0.006594
CES1	16		55	0.03833	rs6499786	0.000422		24	0.368	rs17318582	0.006636
CES7	16		66	0.09855	rs6499786	0.000422		31	0.553	rs17318582	0.006636
CHRNA7	15		64	0.109	rs2048681	0.0006666		35	0.156	rs7179008	0.006716
HDAC9	7		294	0.04149	rs726805	0.0005166		167	0.369	rs2526626	0.006756
IKZF2	2		86	0.04415	rs10186029	1.203e-06		54	0.09395	rs10497987	0.006942
DDX10	11		69	0.182	rs17108567	0.000332		37	0.12108	rs1975911	0.006976
COMMD10	5		92	0.02464	rs4921056	0.0008558		57	0.313	rs250323	0.00717
CDCA7L	7		105	0.123	rs10238945	0.0001935		61	0.10896	rs6461625	0.007206
LRRC7	1		95	0.259	rs6663915	0.000515		59	0.07201	rs17097465	0.007253
FGF3	11		57	0.124	rs11263621	0.0009628		25	0.07144	rs871346	0.007403
C18orf1	18		233	0.659	rs3901208	0.0007728		133	0.581	rs8089773	0.007541
PPAP2B	1		77	0.06509	rs12137489	0.0008211		44	0.246	rs2404716	0.007622
PRKCA	17		287	0.06963	rs7225164	0.0005943		140	0.688	rs9892651	0.007655
USP44	12		55	0.02346	rs301013	0.0002691		30	0.129	rs2098555	0.008285
KLK4	19		58	0.06698	rs2664152	0.0002396		41	0.216	rs10409028	0.008395
KLK5	19		73	0.02011	rs2664152	0.0002396		43	0.286	rs10409028	0.008395
KLK6	19		75	0.00518	rs2664152	0.0002396		45	0.44	rs10409028	0.008395
MRPL17	11		47	0.000695	rs10769719	4.098e-05		40	0.263	rs10839592	0.008438
SLC39A11	17		315	0.264	rs891688	0.0002867		191	0.76	rs4360976	0.008464
CAMK2A	5		79	0.308	rs13360565	0.0008024		56	0.118	rs4958456	0.008518
DNAH11	7		298	0.409	rs10238945	0.0001935		165	0.503	rs17145460	0.008554
TINAG	6		70	0.103	rs243815	0.0005597		37	0.215	rs9357804	0.009023
SOX6	11		114	0.103	rs730993	0.0008705		63	0.379	rs2174163	0.0092
ANGPTL5	11		37	0.00676	rs12363310	4.026e-06		27	0.09155	rs10501992	0.009221
PLXNA2	1		191	0.77	rs631802	0.0009106		90	0.382	rs17187140	0.009459
NIBP	8		273	0.325	rs4236871	0.0005719		225	0.346	rs729855	0.009698
FTO	16		237	0.18	rs9921255	2.299e-05		102	0.211	rs1008400	0.009703
PELI2	14		109	0.528	rs10483656	0.0006109		68	0.879	rs17091045	0.01001
OSR1	2		26	0.156	rs1851412	0.0008615		14	0.0058	rs1813617	0.01025
ANKK1	11		51	0.101	rs7118900	0.0007696		34	0.232	rs7125415	0.01026
DRD2	11		64	0.153	rs7118900	0.0007696		45	0.369	rs7125415	0.01026
APOL4	22		72	0.259	rs13056820	0.0001765		46	0.07512	rs1001294	0.01035
ANGPT1	8		132	0.121	rs1672182	0.0009014		92	0.26	rs7838589	0.01043
CLDN18	3		36	0.00317	rs2622705	0.0007727		20	0.05048	rs3773770	0.01044
CLDN23	8		52	0.03656	rs885000	0.0008342		31	0.108	rs777709	0.01051
TNFRSF13B	17		48	0.141	rs9908528	0.0008056		34	0.568	rs6502552	0.01057
SH2D4B	10		124	0.02038	rs7078901	0.0005139		76	0.503	rs17107520	0.01063
DDX49	19		22	0.02194	rs1468460	0.0004215		13	0.107	rs2074797	0.01071
HOMER3	19		22	0.02524	rs1468460	0.0004215		14	0.111	rs2074797	0.01071
UPF1	19		25	0.03452	rs1468460	0.0004215		14	0.145	rs2074797	0.01071
GDF1	19		27	0.01344	rs1468460	0.0004215		16	0.166	rs2074797	0.01071
COPE	19		28	0.00556	rs1468460	0.0004215		16	0.177	rs2074797	0.01071
LASS1	19		27	0.01388	rs1468460	0.0004215		16	0.177	rs2074797	0.01071
BHLHB2	3		49	0.893	rs9836876	0.00098		26	0.462	rs2671750	0.01109
LHFP	13		175	0.424	rs7996238	0.0004171		93	0.323	rs6563698	0.01136
TPK1	7		118	0.164	rs6957602	0.0004963		80	0.133	rs2040898	0.0115
TRHDE	12		115	0.01286	rs7969680	0.000703		73	0.161	rs7967001	0.01157
DAB1	1		587	0.252	rs4912296	0.0006663		335	0.439	rs11805025	0.01159
PRSS35	6		49	0.00138	rs4706180	0.0002226		20	0.156	rs607259	0.01176
SNAP91	6		65	0.00084	rs4706180	0.0002226		30	0.61	rs607259	0.01176
BCL11A	2		64	0.000341	rs2058703	0.0004008		35	0.151	rs2195086	0.01184
NELL1	11		556	0.669	rs1791862	0.0006575		365	0.943	rs7105978	0.0119
GRID1	10		315	0.523	rs2607842	9.69e-05		177	0.506	rs10887577	0.01199
UBE3A	15		27	0.01391	rs4906955	0.0009076		14	0.206	rs7496451	0.012
RXRA	9		47	0.316	rs3118546	0.0003057		35	0.196	rs4240705	0.01206
NID1	1		84	0.06845	rs11590845	0.0002301		42	0.124	rs4659618	0.01216
AADACL1	3		84	0.10473	rs9865941	0.0008426		43	0.733	rs11914753	0.0122
IBTK	6		46	0.001471	rs9449437	0.0001158		22	0.336	rs62953	0.01222
TRPV3	17		83	0.153	rs2279567	0.0003781		51	0.485	rs222748	0.01263
C10orf27	10		113	0.02431	rs2994241	3.86e-05		70	0.534	rs2994241	0.01303
ADAMTS14	10		155	0.114	rs2994241	3.86e-05		87	0.754	rs2994241	0.01303
SGCZ	8		638	0.753	rs1457223	0.00045		534	0.581	rs12544126	0.01318
RPP38	10		42	0.08584	rs41405548	0.000101		26	0.289	rs12218990	0.01325
C10orf111	10		41	0.08762	rs41405548	0.000101		26	0.356	rs12218990	0.01325
ACBD7	10		49	0.116	rs41405548	0.000101		31	0.49	rs12218990	0.01325
NMT2	10		71	0.05474	rs41405548	0.000101		42	0.587	rs12218990	0.01325
KIAA0564	13		153	0.14	rs17594446	0.0008295		97	0.304	rs1023243	0.01342
NOBOX	7		32	0.07614	rs6957602	0.0004963		18	0.107	rs17195725	0.01353
HMGCS2	1		72	0.274	rs17838168	0.0004236		40	0.346	rs592762	0.01364
ADAM12	10		355	0.105	rs11244813	0.000619		166	0.61	rs10794073	0.01385
SHROOM3	4		189	0.03862	rs4563521	0.0006158		102	0.574	rs12639868	0.01386
ATG5	6		81	0.01278	rs9384603	0.0007146		52	0.07543	rs1475270	0.01397
ESF1	20		57	0.246	rs8124299	0.0001546		30	0.198	rs13042637	0.01422
C20orf7	20		46	0.132	rs8124299	0.0001546		28	0.244	rs13042637	0.01422
PDLIM2	8		45	0.01427	rs3779727	0.0007583		16	0.05217	rs4872524	0.0144
BIN3	8		63	0.0247	rs3779727	0.0007583		32	0.05421	rs4872524	0.0144
APOL3	22		72	0.123	rs13056820	0.0001765		46	0.163	rs132692	0.01458
SLC38A1	12		67	0.02181	rs7980775	0.0004352		45	0.416	rs12833767	0.01485
EXOC3L2	19		23	0.04551	rs12460985	0.0004933		10	0.16	rs17356664	0.01503
ETNK1	12		54	0.248	rs17341505	0.0001905		26	0.26	rs11046486	0.01548
RSBN1	1		28	0.0216	rs2636008	0.0009024		11	0.06308	rs2476599	0.0157
PTPN22	1		33	0.02767	rs2636008	0.0009024		23	0.147	rs2476599	0.0157
TCERG1L	10		230	0.00214	rs2033790	0.0006153		101	0.326	rs2944462	0.01609
BMP7	20		71	0.191	rs6025407	0.0007166		45	0.101	rs6025407	0.01741
ITM2C	2		36	0.07484	rs6731224	0.0009055		37	0.114	rs7577585	0.01744
GPR55	2		40	0.357	rs6731224	0.0009055		38	0.171	rs7577585	0.01744
TMTC2	12		176	0.854	rs17010710	0.0006354		120	0.855	rs10862520	0.01768
ZNF648	1		33	0.01837	rs6695585	2.43e-05		18	0.05479	rs3856104	0.01774
NECAB1	8		42	0.0064	rs1354516	0.0009263		27	0.47	rs10504902	0.01802
C10orf18	10		85	0.505	rs11596406	0.0005603		57	0.285	rs2669138	0.01844
TMEM176B	7		77	0.0188	rs6980179	0.0007719		37	0.505	rs17256042	0.0188
TMEM176A	7		66	0.01361	rs6980179	0.0007719		34	0.551	rs17256042	0.0188
OSBPL10	3		140	0.10562	rs6796265	0.0009502		116	0.455	rs6796265	0.01894
ATXN1	6		344	0.167	rs13219866	0.0006507		196	0.643	rs2237203	0.01902
PHACTR3	20		149	0.464	rs6100526	0.000811		68	0.626	rs1416388	0.01909
NFKBIA	14		63	0.143	rs12879003	0.0009978		24	0.612	rs8005252	0.01946
PSMA6	14		44	0.596	rs12879003	0.0009978		23	0.636	rs8005252	0.01946
SUPT3H	6		83	0.32	rs1321081	0.0007092		69	0.326	rs16872533	0.02023
EGR3	8		49	0.244	rs3779727	0.0007583		32	0.17	rs10104039	0.02026
PSME4	2		51	0.179	rs7569954	0.0001357		25	0.08841	rs3731973	0.02033
PTCD2	5		18	0.0064	rs7734699	0.000378		16	0.05527	rs4703855	0.02042
C6orf60	6		92	0.07098	rs1012509	4.159e-05		63	0.611	rs629109	0.0206
CAPN13	2		112	0.07163	rs11127287	0.0006963		65	0.221	rs1915126	0.02099
GSX1	13		56	0.01716	rs1231054	0.0005921		25	0.351	rs1539659	0.02128
MAML2	11		265	0.313	rs4753192	0.0002932		166	0.422	rs522495	0.02167
SLC7A11	4		44	0.000458	rs1344976	1.094e-05		21	0.195	rs12510909	0.02172
EFNA4	1		33	0.138	rs7534162	0.0004427		21	0.59	rs905938	0.02178
DCST1	1		39	0.09349	rs7534162	0.0004427		19	0.629	rs905938	0.02178
ADAM15	1		34	0.108	rs7534162	0.0004427		21	0.702	rs905938	0.02178
CSMD2	1		353	0.201	rs1564276	7.021e-05		219	0.458	rs16836145	0.02254
TM2D3	15		34	0.218	rs708394	0.000141		15	0.385	rs10152467	0.02271
TARSL2	15		43	0.252	rs708394	0.000141		18	0.5	rs10152467	0.02271
KIF26A	14		31	0.10068	rs1547350	9.726e-05		23	0.646	rs8007923	0.02287
PREP	6		57	0.246	rs17065726	0.0004282		44	0.907	rs947213	0.02308
ATP2B2	3		173	0.04134	rs13323090	0.0008364		118	0.419	rs4684687	0.02324
MYO3B	2		313	0.437	rs6729519	0.0001963		177	0.571	rs10930434	0.02356
PRCD	17		32	0.106	rs8076730	0.0007506		13	0.213	rs7209626	0.02387
CYGB	17		36	0.08247	rs8076730	0.0007506		15	0.297	rs7209626	0.02387
BBX	3		106	0.352	rs6802043	0.0006923		75	0.436	rs9834673	0.02389
ASPA	17		70	0.206	rs2279567	0.0003781		43	0.505	rs7212403	0.02395
AP3B1	5		79	0.01697	rs252782	0.0005943		57	0.462	rs6887042	0.02405
ABCB4	7		125	0.00932	rs17149606	0.0003102		34	0.781	rs6949448	0.02431
POLE3	9		56	0.02591	rs10817488	0.0003442		36	0.229	rs2761016	0.02448
C9orf43	9		54	0.04052	rs10817488	0.0003442		33	0.229	rs2761016	0.02448
ALAD	9		60	0.02882	rs10817488	0.0003442		38	0.257	rs2761016	0.02448
HDHD3	9		62	0.02723	rs10817488	0.0003442		39	0.274	rs2761016	0.02448
BSPRY	9		70	0.03949	rs10817488	0.0003442		45	0.368	rs2761016	0.02448
LDLRAD3	11		223	0.212	rs995328	0.0003515		128	0.569	rs7931043	0.02471
SPINT3	20		49	0.03161	rs6017588	0.00019		18	0.115	rs6130852	0.02533
WFDC2	20		45	0.04501	rs6017588	0.00019		26	0.14	rs6130852	0.02533
WFDC6	20		49	0.02202	rs6017588	0.00019		20	0.161	rs6130852	0.02533
SPINLW1	20		54	0.02462	rs6017588	0.00019		20	0.162	rs6130852	0.02533
CHCHD9	9		48	0.05107	rs1987186	0.0003012		28	0.393	rs4877490	0.02536
PCP4	21		115	0.02785	rs760149	8.26e-05		70	0.564	rs2037916	0.02545
FLJ20184	4		63	0.06134	rs4698944	0.0007217		42	0.788	rs6813330	0.0257
SPHK1	17		22	0.04039	rs11077815	0.0001471		10	0.174	rs9889656	0.02586
UBE2O	17		37	0.04279	rs11077815	0.0001471		17	0.284	rs9889656	0.02586
PRPSAP1	17		44	0.238	rs11077815	0.0001471		23	0.314	rs9889656	0.02586
ASPRV1	2		28	0.02479	rs6756513	0.0006211		8	0.106	rs6731423	0.02591
MXD1	2		34	0.03429	rs6756513	0.0006211		11	0.128	rs6731423	0.02591
RY1	2		34	0.06127	rs6756513	0.0006211		10	0.175	rs6731423	0.02591
GALNT2	1		173	0.442	rs11122300	0.0001189		91	0.458	rs7550262	0.02601
APCDD1L	20		68	0.17	rs6026308	0.0004494		44	0.345	rs11697646	0.02645
MRPS27	5		40	0.02894	rs7734699	0.000378		33	0.604	rs7734699	0.02735
SLC22A23	6		141	0.317	rs10900943	0.0009765		86	0.49	rs9392500	0.02745
HNRNPR	1		30	0.01491	rs667311	0.0007817		14	0.106	rs2849025	0.02753
PPA2	4		46	0.109	rs4698944	0.0007217		29	0.326	rs2647242	0.02776
TXNDC2	18		63	0.292	rs11665575	0.0005825		31	0.158	rs1158565	0.02786
VAPA	18		97	0.181	rs11665575	0.0005825		41	0.716	rs1158565	0.02786
ALG5	13		39	0.09349	rs9547715	0.0004671		15	0.407	rs515397	0.0279
PRPF4B	6		65	0.373	rs12110567	0.0006814		43	0.562	rs17137399	0.02804
FAM167B	1		19	0.04302	rs7535470	0.0008516		6	0.405	rs695161	0.02814
LCK	1		19	0.03665	rs7535470	0.0008516		6	0.419	rs695161	0.02814
EIF3I	1		20	0.06406	rs7535470	0.0008516		7	0.486	rs695161	0.02814
ASB13	10		68	0.253	rs11596406	0.0005603		56	0.23	rs4747914	0.02815
CRHR1	17		40	0.00726	rs242943	0.000246		24	0.511	rs1880756	0.02844
IGF2AS	11		29	0.11	rs7924316	0.0006292		16	0.55	rs1004446	0.02967
INS	11		31	0.07358	rs7924316	0.0006292		18	0.602	rs1004446	0.02967
INS-IGF2	11		32	0.0732	rs7924316	0.0006292		18	0.632	rs1004446	0.02967
IGF2	11		36	0.05692	rs7924316	0.0006292		22	0.641	rs1004446	0.02967
TH	11		36	0.117	rs7924316	0.0006292		23	0.761	rs1004446	0.02967
TMOD2	15		42	0.0079	rs28555597	0.0004277		27	0.07074	rs2252831	0.03002
PRKAA2	1		48	0.07804	rs12137489	0.0008211		22	0.599	rs1156845	0.03012
DMRT2	9		77	0.197	rs10958885	0.000993		37	0.589	rs1016565	0.03035
DMRT3	9		60	0.0496	rs10958885	0.000993		33	0.612	rs1016565	0.03035
COBL	7		139	0.361	rs4948194	0.0007375		69	0.44	rs10273	0.03074
EPHB2	1		127	0.285	rs12086772	0.0005841		60	0.391	rs12732926	0.0308
INADL	1		195	0.01798	rs7515090	0.0002265		112	0.702	rs6698337	0.03092
NRIP3	11		48	0.00735	rs2116510	0.0009932		27	0.412	rs3763904	0.03099
NBPF7	1		42	0.331	rs17838168	0.0004236		24	0.10125	rs7547168	0.03105
SORBS1	10		196	0.114	rs3737015	0.0006782		110	0.945	rs12247017	0.03108
LHX3	9		29	0.03317	rs3780190	0.0009922		11	0.243	rs12002547	0.03114
TTC12	11		69	0.06183	rs7118900	0.0007696		43	0.211	rs2236709	0.03138
NKAIN2	6		447	0.659	rs9385352	0.000962		295	0.896	rs7740489	0.03223
CNTN3	3		134	0.186	rs6549614	0.0002285		75	0.392	rs6549608	0.03229
PHTF1	1		26	0.07797	rs2636008	0.0009024		11	0.10516	rs12117799	0.03229
SPATA22	17		69	0.158	rs2279567	0.0003781		44	0.295	rs10491216	0.03364
VAPB	20		67	0.06944	rs6026308	0.0004494		37	0.114	rs6100061	0.03378
NTRK2	9		175	0.115	rs1619120	0.0002348		88	0.849	rs1659412	0.03392
TECTB	10		52	0.312	rs1926563	0.0006962		25	0.314	rs7896275	0.03403
GPR56	16		104	0.119	rs8052115	0.0009451		54	0.223	rs935740	0.0343
GPR97	16		82	0.178	rs8052115	0.0009451		53	0.405	rs935740	0.0343
MST1R	3		17	0.171	rs9858428	0.0007179		11	0.07152	rs11713193	0.03527
CAMKV	3		23	0.0775	rs9858428	0.0007179		10	0.09431	rs11713193	0.03527
TRAIP	3		23	0.04491	rs9858428	0.0007179		13	0.122	rs11713193	0.03527
LYSMD2	15		41	0.00899	rs28555597	0.0004277		26	0.08291	rs16964483	0.03546
SCG3	15		45	0.01343	rs28555597	0.0004277		25	0.113	rs16964483	0.03546
ACTN2	1		89	0.04301	rs1341863	0.0008902		50	0.111	rs7542508	0.03565
RUNX2	6		80	0.278	rs1321081	0.0007092		55	0.535	rs7750470	0.03583
LOC643923	11		45	0.108	rs6588972	7.826e-05		21	0.87	rs1939894	0.03606
ELMOD1	11		75	0.101	rs6588972	7.826e-05		32	0.889	rs1939894	0.03606
OSGIN2	8		38	0.05119	rs1805818	0.0003821		23	0.272	rs16901239	0.03742
GRM3	7		56	0.06842	rs17607448	0.0009441		46	0.446	rs6943762	0.03749
CYSLTR2	13		40	0.02661	rs7335086	0.0008374		15	0.319	rs9591207	0.03787
FAT4	4		130	0.0328	rs13146586	0.0005262		55	0.726	rs1848581	0.03857
NKPD1	19		26	0.05373	rs12460985	0.0004933		10	0.263	rs6509196	0.04083
TRAPPC6A	19		29	0.05451	rs12460985	0.0004933		13	0.328	rs6509196	0.04083
KCNU1	8		42	0.01855	rs10503996	0.0001112		20	0.679	rs17305805	0.04125
ARSI	5		45	0.07418	rs13360565	0.0008024		26	0.322	rs4958445	0.04125
FLJ46481	4		95	0.104	rs7682973	0.0007491		70	0.588	rs17694785	0.04163
KLK2	19		66	0.112	rs2664152	0.0002396		39	0.294	rs198979	0.04179
NOL10	2		73	0.02794	rs1728143	0.0005602		49	0.273	rs2357649	0.04234
SLC23A2	20		98	0.10885	rs261355	0.0003599		64	0.902	rs1715378	0.04241
KPRP	1		65	0.09199	rs7549803	0.0003818		13	0.141	rs12754243	0.04351
LOC644928	1		50	0.111	rs4912296	0.0006663		35	0.372	rs2025617	0.04414
KIAA0556	16		66	0.00368	rs9929450	0.0003329		33	0.33	rs733683	0.04454
NFATC2	20		158	0.237	rs6067758	0.0002832		60	0.407	rs6126251	0.04479
A4GNT	3		26	0.01656	rs405265	0.0006653		9	0.08671	rs2622717	0.04526
EPRS	1		46	0.07128	rs2053250	0.000978		20	0.102	rs2647463	0.0453
C1orf94	1		63	0.03507	rs1564276	7.021e-05		47	0.399	rs1414472	0.046
CHCHD6	3		52	0.000862	rs9872353	0.0003627		42	0.566	rs4624521	0.04656
UBA7	3		17	0.05446	rs9858428	0.0007179		8	0.244	rs2777888	0.04701
RAB22A	20		54	0.181	rs6128327	0.0005817		25	0.43	rs2268921	0.04709
C5	9		36	0.000594	rs7021880	0.0005153		29	0.342	rs10818503	0.04737
STK35	20		81	0.554	rs6075784	0.0009783		38	0.503	rs6075784	0.04801
LRRC6	8		38	0.01645	rs10956678	0.0001904		36	0.67	rs10956672	0.04832
LOC26010	2		121	0.04294	rs1975583	0.0001783		85	0.793	rs13024020	0.04982
LIN28B	6		40	0.02775	rs9404590	0.0007536		25	0.478	rs170276	0.05013
TSHZ3	19		69	0.00896	rs1982933	0.0003327		39	0.617	rs13345671	0.05108
MTAP	9		59	0.05848	rs7023954	0.0006961		30	0.518	rs2039971	0.05255
TMEM133	11		46	0.06058	rs12420167	0.0008364		38	0.893	rs17647207	0.05264
BPNT1	1		26	0.01335	rs2053250	0.000978		13	0.201	rs2647458	0.05267
CDH5	16		52	0.126	rs1370262	0.0009513		41	0.792	rs7185033	0.05288
CPO	2		48	0.282	rs1006389	0.0003748		22	0.629	rs11695049	0.05323
QSOX2	9		27	0.03021	rs3780190	0.0009922		10	0.434	rs1164891	0.05333
PAN3	13		45	0.2	rs7995100	0.0002366		26	0.704	rs3794399	0.05336
FLT1	13		97	0.459	rs7995100	0.0002366		52	0.704	rs3794399	0.05336
GC	4		45	0.05028	rs1352845	0.0002689		23	0.28	rs11737702	0.05415
PHF19	9		32	0.000684	rs1609810	0.0003095		9	0.127	rs881375	0.05508
PSMD5	9		30	0.01217	rs1609810	0.0003095		13	0.177	rs881375	0.05508
TRAF1	9		34	0.000795	rs1609810	0.0003095		16	0.302	rs881375	0.05508
TRAF1	9		34	0.000858	rs1609810	0.0003095		16	0.302	rs881375	0.05508
P2RX6	22		63	0.19	rs2073598	0.0005605		46	0.611	rs6519749	0.05556
SLC7A4	22		58	0.15	rs2073598	0.0005605		42	0.618	rs6519749	0.05556
DKK3	11		89	0.06383	rs6485416	0.0004372		56	0.617	rs12225759	0.05581
C6orf191	6		65	0.115	rs9398926	0.0007746		29	0.402	rs9375674	0.05674
DEFB125	20		26	0.0886	rs6133348	0.0003505		18	0.417	rs6086616	0.05695
OLAH	10		54	0.154	rs41405548	0.000101		29	0.654	rs10906823	0.05819
OAF	11		47	0.10715	rs513638	0.0005221		23	0.413	rs2508490	0.05823
MAN1A1	6		98	0.03979	rs1012509	4.159e-05		56	0.399	rs17441889	0.05882
MED15	22		68	0.0557	rs654526	0.0007047		35	0.605	rs1860127	0.05943
CSNK1A1L	13		35	0.275	rs1208131	0.000189		10	0.537	rs17821630	0.05946
RECK	9		69	0.04255	rs10972680	0.0009707		42	0.619	rs13283904	0.06006
ULK4	3		131	0.06463	rs17056863	8.762e-05		94	0.847	rs4973893	0.06093
SYT17	16		98	0.03618	rs3785351	0.0002664		59	0.685	rs9673444	0.06093
MUCL1	12		16	0.149	rs2887921	0.000685		14	0.554	rs7971094	0.06167
ELF3	1		56	0.195	rs9427477	0.0005653		28	0.668	rs10920300	0.06268
ALPK2	18		122	0.134	rs11152086	0.0004384		84	0.832	rs4940724	0.06269
GRXCR1	4		81	0.07731	rs7684630	0.0008624		43	0.511	rs1561147	0.06534
SAMD14	17		51	0.178	rs3809762	0.0005978		20	0.578	rs2586471	0.0657
CCDC135	16		71	0.191	rs8052115	0.0009451		43	0.679	rs2305307	0.06629
ZFP90	16		25	0.111	rs1467952	0.0008921		11	0.11	rs1645929	0.06654
SCN3A	2		51	0.119	rs10930150	0.0005425		31	0.894	rs16850090	0.06658
SUCLG2	3		150	0.00261	rs9824834	4.514e-05		78	0.818	rs1928565	0.0689
P2RX2	12		39	0.377	rs11146953	0.0006224		20	0.779	rs5744807	0.06936
POLE	12		59	0.432	rs11146953	0.0006224		27	0.832	rs5744807	0.06936
ASCL3	11		28	0.00308	rs2116510	0.0009932		13	0.388	rs16906614	0.06982
TMEM9B	11		30	0.00242	rs2116510	0.0009932		15	0.471	rs16906614	0.06982
RCBTB1	13		72	0.03865	rs9591288	0.0007778		43	0.228	rs2980	0.06994
RGMB	5		28	0.0026	rs2662256	5.407e-05		21	0.32	rs2302981	0.07002
PCOLCE2	3		49	0.0598	rs2707982	0.0006467		44	0.819	rs9832659	0.07138
DEFB126	20		39	0.01991	rs6133348	0.0003505		23	0.739	rs6515824	0.07254
DEFB127	20		40	0.01931	rs6133348	0.0003505		21	0.782	rs6515824	0.07254
EPC2	2		41	0.01502	rs978509	0.0008709		28	0.703	rs10497039	0.07256
GPAM	10		54	0.00147	rs2277207	0.0001994		16	0.911	rs12572167	0.07407
GTF2H5	6		27	0.01615	rs644637	5.296e-06		15	0.487	rs6929952	0.07419
SLC12A1	15		49	0.00757	rs12592155	0.0008869		14	0.121	rs6493318	0.07433
IMP5	17		30	0.01015	rs242943	0.000246		18	0.648	rs242939	0.07659
LAPTM5	1		64	0.284	rs10798810	0.0008866		30	0.805	rs12063364	0.07784
ACVR1	2		48	0.173	rs12936	0.0005573		32	0.348	rs4363980	0.0784
ATOH1	4		47	0.04906	rs12643691	0.0004228		23	0.373	rs893709	0.07848
ATP12A	13		82	0.405	rs943051	0.0003742		43	0.861	rs7335289	0.07856
BDH1	3		47	0.01388	rs7616534	0.000726		27	0.648	rs7616998	0.07916
EXOC6	10		173	0.04843	rs2497339	0.0003908		43	0.61	rs2497327	0.07991
ZDHHC17	12		41	0.07809	rs11115922	0.0008329		27	0.713	rs12309141	0.07996
ZCCHC14	16		43	0.02083	rs12932271	0.0003134		31	0.721	rs9922687	0.08021
HP	16		22	0.0717	rs1820248	0.0006947		13	0.266	rs5468	0.08034
DHODH	16		39	0.191	rs1820248	0.0006947		25	0.569	rs5468	0.08034
GOLSYN	8		61	0.000459	rs1892759	0.0001405		43	0.521	rs2844234	0.08177
EBAG9	8		36	0.000829	rs1892759	0.0001405		23	0.731	rs2844234	0.08177
TMEM71	8		29	0.01968	rs10956678	0.0001904		24	0.452	rs10283307	0.08192
EPHX2	8		99	0.03607	rs7341557	0.0001512		56	0.714	rs11135993	0.08219
BANF2	20		65	0.462	rs16999625	0.0002232		35	0.867	rs6131987	0.08245
CEP152	15		58	0.01555	rs1677251	0.0008037		30	0.786	rs16961733	0.08389
PDK2	17		50	0.162	rs3809762	0.0005978		19	0.742	rs2586464	0.08469
WDR31	9		72	0.146	rs10817488	0.0003442		45	0.593	rs8177812	0.08514
TRIM29	11		48	0.14	rs513638	0.0005221		23	0.76	rs4936507	0.08684
KIAA0415	7		15	0.09449	rs17135128	0.0004719		13	0.37	rs17829472	0.08717
FOXK1	7		36	0.182	rs17135128	0.0004719		18	0.646	rs17829472	0.08717
C9orf102	9		39	0.01645	rs678244	0.0001884		25	0.691	rs14884	0.0874
C11orf16	11		30	0.00407	rs2116510	0.0009932		13	0.589	rs2455603	0.08813
C11orf17	11		30	0.00398	rs2116510	0.0009932		15	0.593	rs2455603	0.08813
CSRP2	12		31	0.07274	rs11115922	0.0008329		23	0.786	rs7976747	0.08984
A4GALT	22		61	0.03804	rs135106	0.0004981		31	0.792	rs2413716	0.09034
EGFR	7		148	0.501	rs17584903	0.0005815		93	0.929	rs11761161	0.09107
LCE1F	1		50	0.0572	rs7549803	0.0003818		10	0.31	rs7524281	0.09121
LCE1A	1		31	0.01385	rs7549803	0.0003818		8	0.32	rs7524281	0.09121
LCE1C	1		38	0.08587	rs7549803	0.0003818		11	0.353	rs7524281	0.09121
LCE1E	1		47	0.07699	rs7549803	0.0003818		11	0.368	rs7524281	0.09121
LCE1B	1		30	0.05133	rs7549803	0.0003818		11	0.378	rs7524281	0.09121
LCE1D	1		41	0.101	rs7549803	0.0003818		11	0.385	rs7524281	0.09121
DUT	15		34	0.00391	rs12592155	0.0008869		15	0.257	rs7179027	0.09135
AIFM3	22		55	0.09214	rs2073598	0.0005605		35	0.575	rs178272	0.09138
LZTR1	22		58	0.116	rs2073598	0.0005605		39	0.592	rs178272	0.09138
THAP7	22		53	0.218	rs2073598	0.0005605		37	0.659	rs178272	0.09138
CDC42EP3	2		66	0.06781	rs17463383	0.0003614		33	0.65	rs10172526	0.09154
NFASC	1		135	0.315	rs2759282	0.0006908		77	0.837	rs2595955	0.09529
IQCB1	3		26	0.01868	rs9826473	0.000951		16	0.345	rs1920322	0.09619
EAF2	3		46	0.236	rs9826473	0.000951		15	0.348	rs1920322	0.09619
OR2S2	9		49	0.04854	rs10972680	0.0009707		26	0.589	rs10758338	0.09736
PCDH1	5		61	0.00861	rs166040	0.0004606		34	0.679	rs10063472	0.09781
MAPT	17		64	0.02658	rs242943	0.000246		29	0.601	rs6503454	0.1002
DEFB128	20		37	0.02263	rs6133348	0.0003505		19	0.765	rs6039029	0.1051
SFTPD	10		50	0.009	rs7072441	0.0005875		21	0.691	rs7084667	0.1062
GPR139	16		55	0.227	rs2608173	0.0009987		28	0.669	rs2521477	0.1088
C9orf4	9		54	0.124	rs523340	0.0006497		46	0.886	rs7858370	0.1092
C10orf129	10		47	0.02267	rs601746	0.0005447		20	0.735	rs11188233	0.1094
PDLIM1	10		78	0.03511	rs3737015	0.0006782		40	0.849	rs11188233	0.1094
CYP7B1	8		92	0.189	rs7815372	0.0007845		27	0.785	rs12546399	0.1094
PGR	11		84	0.177	rs12420167	0.0008364		41	0.647	rs486992	0.1094
FBXO47	17		37	0.228	rs600158	0.0007807		24	0.874	rs638366	0.1097
SERAC1	6		50	0.06673	rs644637	5.296e-06		28	0.782	rs9365947	0.11
PAK4	19		43	0.172	rs8111996	0.0005862		23	0.764	rs6508849	0.1106
KATNB1	16		51	0.108	rs8052115	0.0009451		37	0.742	rs2404689	0.111
REG4	1		53	0.352	rs17838168	0.0004236		28	0.49	rs2282403	0.1134
BLOC1S3	19		24	0.03635	rs12460985	0.0004933		11	0.454	rs12460041	0.1147
WISP2	20		42	0.479	rs2281862	0.0006771		16	0.249	rs4812851	0.1151
EBPL	13		48	0.0108	rs9591288	0.0007778		17	0.342	rs748678	0.1157
NBN	8		40	0.0135	rs1805818	0.0003821		19	0.389	rs1881467	0.1165
KCNK15	20		42	0.464	rs2281862	0.0006771		18	0.515	rs4812858	0.1168
SUV39H2	10		29	0.174	rs7894284	0.0006758		14	0.647	rs7907802	0.117
HSPA14	10		38	0.01229	rs7894284	0.0006758		22	0.718	rs7907802	0.117
SMPD3	16		41	0.08869	rs1467952	0.0008921		25	0.475	rs11649335	0.1236
RAB3GAP2	1		55	0.01456	rs12026681	0.0003072		26	0.89	rs17566172	0.1247
IL4R	16		55	0.04634	rs1805010	0.0006164		36	0.756	rs2057768	0.1269
RHBDF2	17		34	0.06364	rs8076730	0.0007506		12	0.537	rs4238992	0.1271
AANAT	17		28	0.04545	rs8076730	0.0007506		10	0.652	rs4238992	0.1271
RB1	13		63	0.01744	rs9332281	0.0004798		13	0.621	rs2804088	0.1284
DSEL	18		51	0.00149	rs1351407	0.0005387		18	0.705	rs1904846	0.1328
RNASEH2B	13		57	0.172	rs9591380	0.0004455		36	0.779	rs2025945	0.1348
C9orf5	9		55	0.103	rs523340	0.0006497		41	0.865	rs12555920	0.1406
UNC13B	9		62	0.297	rs7851161	0.0002003		26	0.69	rs1927952	0.1445
IARS2	1		36	0.01069	rs2053250	0.000978		12	0.622	rs904328	0.1461
ARL11	13		36	0.00626	rs9591288	0.0007778		16	0.4	rs4942859	0.1463
OR2AG2	11		50	0.01283	rs10769719	4.098e-05		34	0.814	rs4758457	0.1482
EFNA1	1		28	0.00588	rs6665822	0.0001221		12	0.547	rs7517162	0.1484
DPM3	1		28	0.00688	rs6665822	0.0001221		11	0.554	rs7517162	0.1484
RAG1AP1	1		28	0.00674	rs6665822	0.0001221		11	0.564	rs7517162	0.1484
EFNA3	1		35	0.01448	rs6665822	0.0001221		20	0.81	rs7517162	0.1484
OR2AG1	11		49	0.05838	rs949901	0.0003092		27	0.801	rs7102536	0.1503
OR6A2	11		48	0.146	rs4366466	0.000888		25	0.788	rs7102536	0.1503
ITM2B	13		24	0.001025	rs3809328	0.0001109		9	0.714	rs9332281	0.1516
PSMB7	9		63	0.01417	rs3780197	0.0007411		23	0.712	rs11794849	0.1534
DECR1	8		30	0.00479	rs1805818	0.0003821		14	0.496	rs2073635	0.1609
ZP4	1		51	0.241	rs7520520	0.0005914		20	0.765	rs548164	0.1637
SOX10	22		21	0.328	rs9610875	0.0008724		6	0.507	rs3026659	0.1772
C22orf23	22		23	0.259	rs9610875	0.0008724		5	0.528	rs3026659	0.1772
POLR2F	22		24	0.27	rs9610875	0.0008724		6	0.566	rs3026659	0.1772
ITGA3	17		59	0.172	rs3809762	0.0005978		20	0.897	rs7215959	0.1825
C20orf30	20		29	0.03119	rs261355	0.0003599		15	0.934	rs6053063	0.1935
ANXA1	9		61	0.01012	rs17653504	0.0008498		36	0.978	rs10869237	0.1954
MARK3	14		44	0.03047	rs8015712	0.0004825		27	0.745	rs2296487	0.1955
C3orf54	3		17	0.04945	rs9858428	0.0007179		7	0.547	rs9829155	0.2143
LOC389118	3		17	0.04887	rs9858428	0.0007179		7	0.567	rs9829155	0.2143
CROT	7		97	0.01235	rs17149606	0.0003102		28	0.949	rs11976069	0.221
METAP2	12		57	0.00333	rs301013	0.0002691		25	0.964	rs12230722	0.2228
TMEM45A	3		47	0.08814	rs12636452	0.0006734		27	0.965	rs17280554	0.2286
FAM48A	13		41	0.07936	rs1208131	0.000189		11	0.549	rs954370	0.2297
SS18	18		21	0.004196	rs4800718	0.0007777		13	0.893	rs4800711	0.2331
KRTCAP2	1		27	0.0225	rs6665822	0.0001221		9	0.591	rs3814316	0.2426
TRIM46	1		28	0.05992	rs6665822	0.0001221		10	0.637	rs3814316	0.2426
RUNX1T1	8		30	0.04025	rs10093292	0.000444		14	0.915	rs4500123	0.2545
GLIS1	1		125	0.102	rs11206162	0.0008088		60	0.997	rs3887651	0.2718
DNAJB9	7		32	0.03986	rs17155982	0.0008631		16	0.895	rs12673049	0.29
THAP5	7		29	0.04649	rs17155982	0.0008631		15	0.929	rs12673049	0.29
EXOSC8	13		21	0.02126	rs9547715	0.0004671		7	0.591	rs7317750	0.3032
FLJ16165	19		44	0.121	rs8111996	0.0005862		24	0.962	rs11669124	0.3193
RCBTB2	13		36	0.02916	rs9595930	0.0009229		9	0.894	rs9591171	0.3482
DMRTB1	1		35	0.02184	rs11206162	0.0008088		24	0.976	rs953625	0.3555
EIF3EIP	22		19	0.11	rs9610875	0.0008724		8	0.898	rs2285177	0.371
PIK3R3	1		31	0.134	rs1052610	0.0008177		19	0.939	rs3845301	0.3934
MAST2	1		38	0.08238	rs1052610	0.0008177		35	0.912	rs11211176	0.4003
FKSG2	8		18	0.0244	rs10503996	0.0001112		7	0.945	rs1005583	0.444
MICALL1	22		20	0.231	rs9610875	0.0008724		5	0.811	rs5750508	0.4539
PSMA8	18		14	0.00947	rs4800718	0.0007777		7	0.856	rs4800250	0.4611
SLC4A1AP	2		29	0.05516	rs11692692	0.0004683		7	0.861	rs867282	0.4625
C1orf91	1		18	0.12	rs7535470	0.0008516		6	0.939	rs669538	0.4939
IQCC	1		18	0.07598	rs7535470	0.0008516		6	0.943	rs669538	0.4939
DCDC2B	1		19	0.07981	rs7535470	0.0008516		6	0.948	rs669538	0.4939
CCDC28B	1		18	0.07416	rs7535470	0.0008516		6	0.953	rs669538	0.4939
ZNF512	2		34	0.04424	rs11692692	0.0004683		10	0.852	rs10165098	0.5658
GPN1	2		36	0.104	rs11692692	0.0004683		8	0.826	rs2141372	0.5898
CCDC121	2		32	0.03906	rs11692692	0.0004683		9	0.859	rs2141372	0.5898
SUPT7L	2		29	0.08437	rs11692692	0.0004683		8	0.882	rs2141372	0.5898
(b) SNPs nominally significant in both African Americans and Whites
Gene	Chr	SNP	A1	African Americans	MAF_cases	MAF_controls	OR	P-value	Whites	MAF_cases	MAF_controls	OR	P-value
C10orf27/ADAMTS14	10	rs2994241	G		0.4271	0.3056	1.732	3.86e-05		0.1401	0.1597	0.8573	0.01303
BMP7	20	rs6025407*	T		0.4462	0.3431	1.549	0.0007166		0.4507	0.4249	1.111	0.01741
OSBPL10	3	rs6796265	G		0.4251	0.4698	0.6572	0.0009502		0.4638	0.4383	1.109	0.01894
MRPS27	5	rs7734699	G		0.1927	0.1131	1.934	0.000378		0.01923	0.02677	0.7128	0.02735
STK35	20	rs6075784*	T		0.3021	0.2154	1.61	0.0009783		0.505**	0.4831	1.09	0.04801
	*The same direction of the effect in African Americans and Whites
	**Since the variant T allele frequency is above 0.5 in cases, the figure given pertains to the variant allele frequency (not the minor allele frequency)
